# Supplementary material for: Facile sonochemical synthesis and electrochemical investigation of ceria/graphene nanocomposites
Source: Royal Society of Chemistry journal article supplement (doi:10.1039/c4tb01847h), 2015-01-01
Supplement: c4tb01847h1.pdf [file c4tb01847h1.pdf]

### Supplementary information

Facile sonochemical synthesis and electrochemically investigation of ceria/graphene nanocomposites

Amin Shiralizadeh Dezfuli,<sup>a</sup> Mohammad Reza Ganjali,<sup>\*ab</sup> Parviz Norouzi<sup>ab</sup> and Farnoush Faridbod<sup>ab</sup>,

<sup>a</sup> Center of Excellence in Electrochemistry, Faculty of Chemistry, University of Tehran, Tehran, Iran.

<sup>b</sup> Biosensor Research Center, Endocrinology & Metabolism Molecular-Cellular Sciences Institute, Tehran University of Medical Sciences, Tehran, Iran.

#### Corresponding Author

Prof. Mohammad Reza Ganjali

E-mail: ganjali@khayam.ut.ac.ir

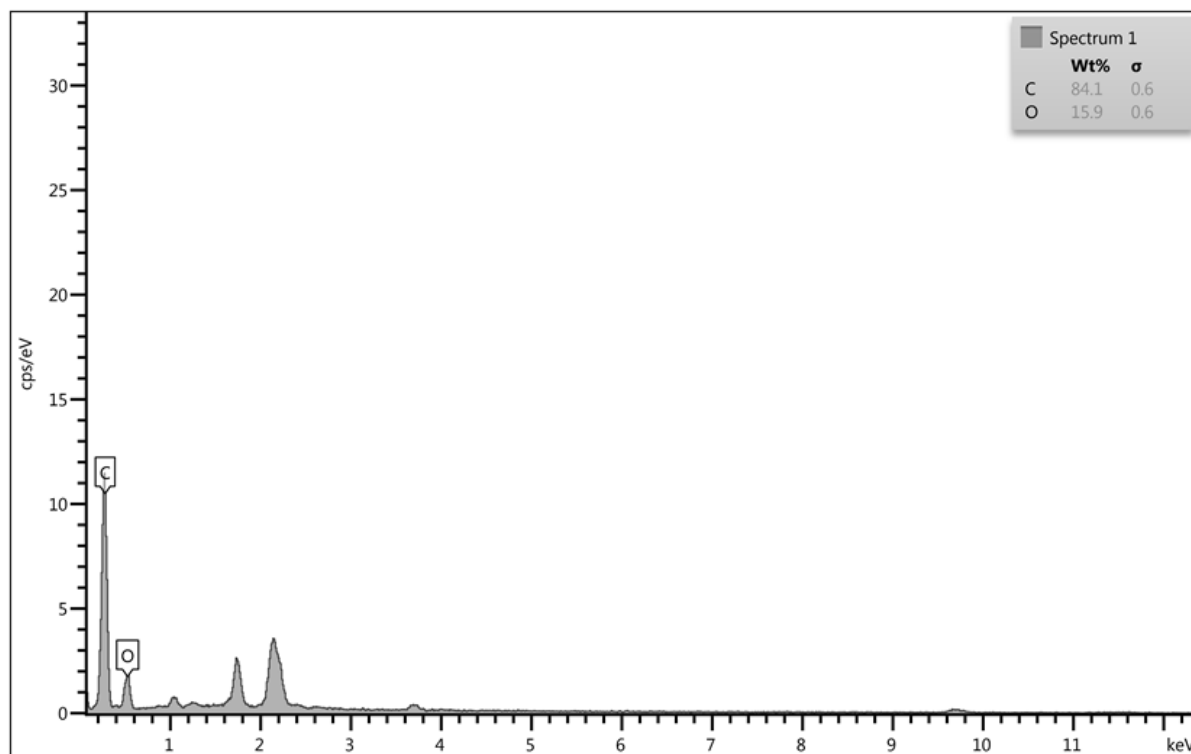

Fig. S1 EDX analysis of RGO.

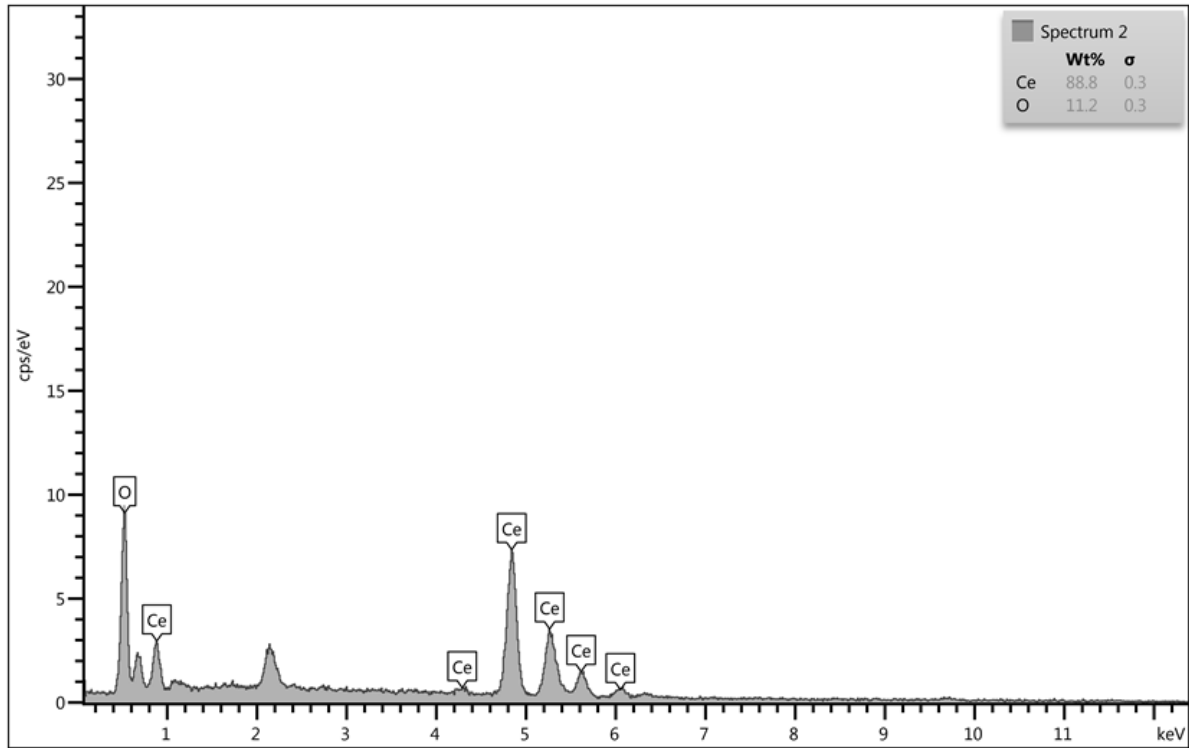

Fig. S2 EDX analysis of Ceria.

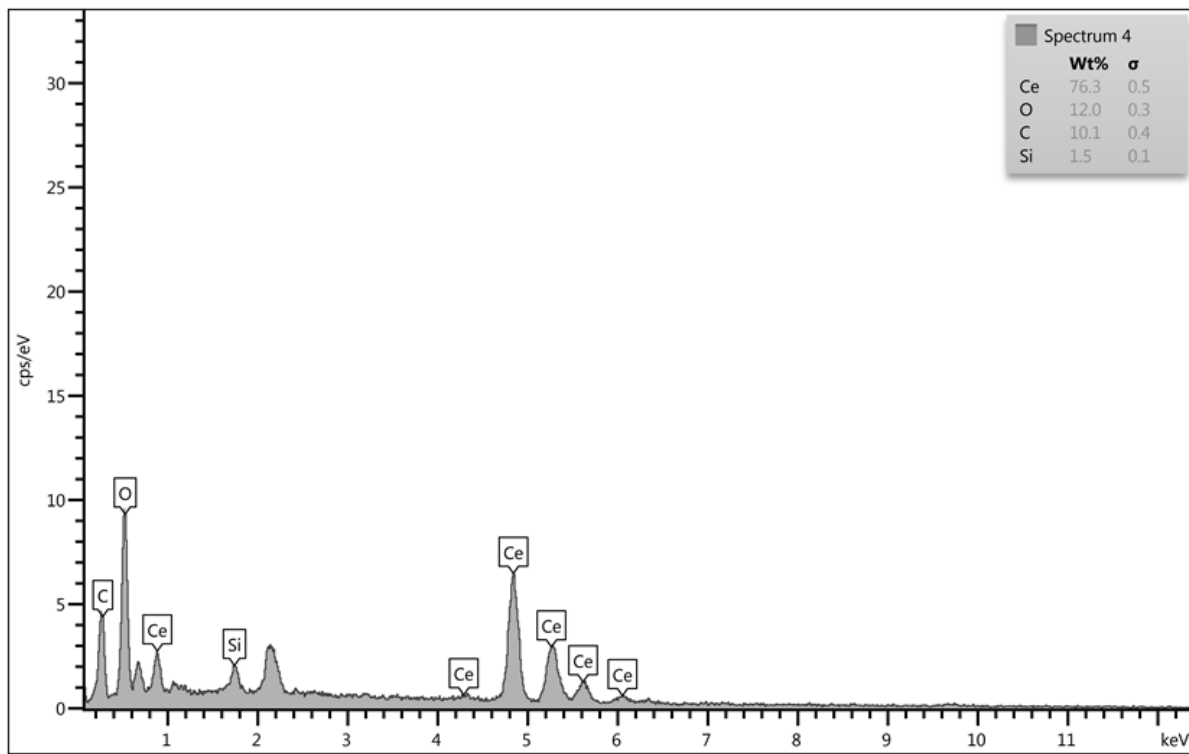

Fig. S3 EDX analysis of CG.

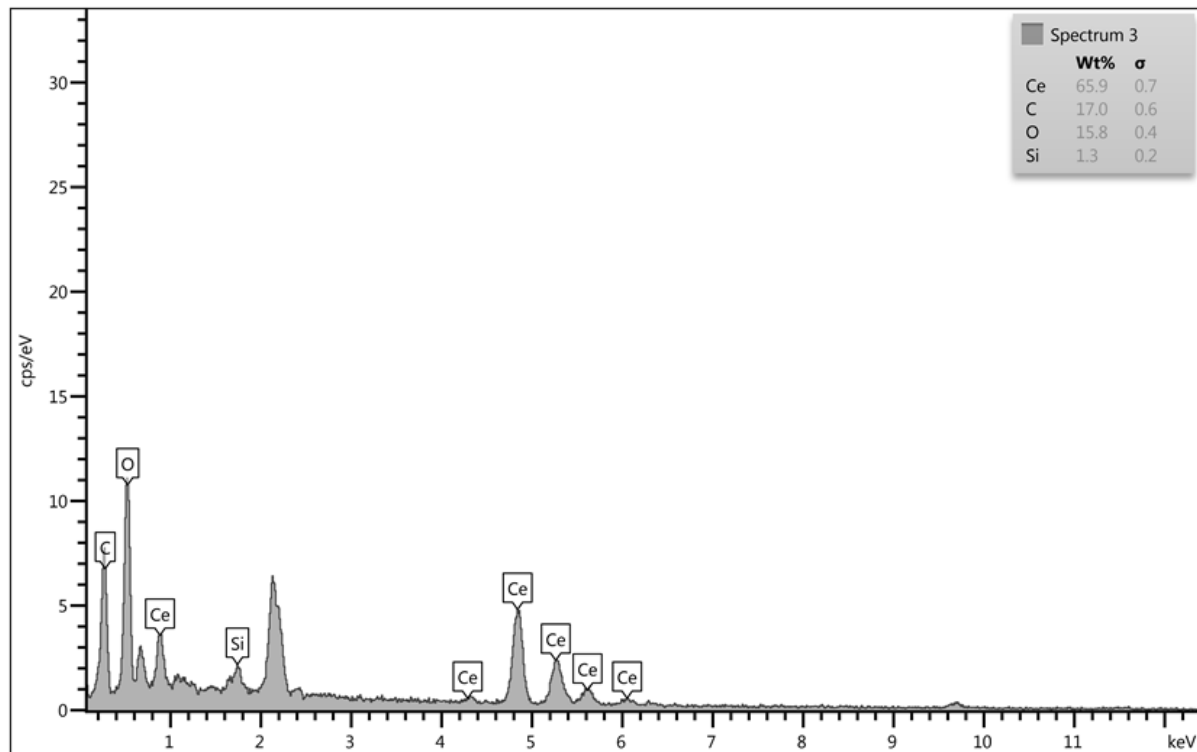

Fig. S4 EDX analysis of CG1.

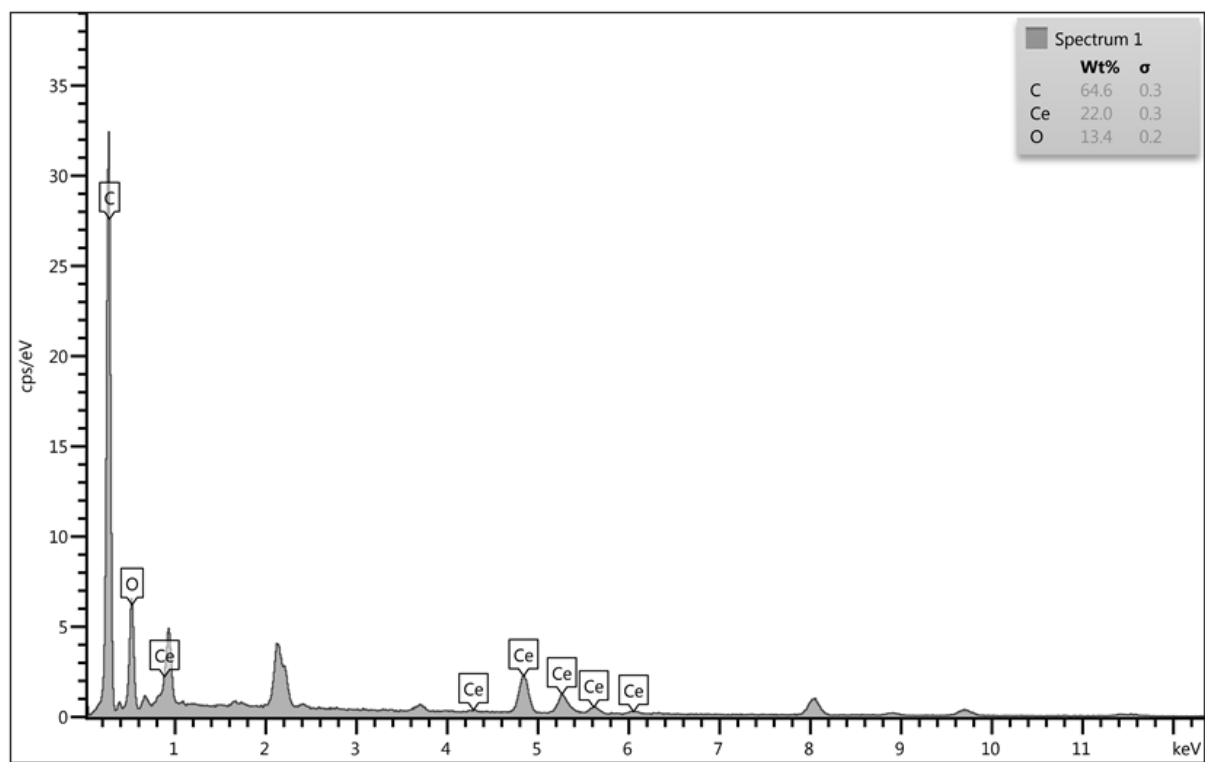

Fig. S5 EDX analysis of CG2.

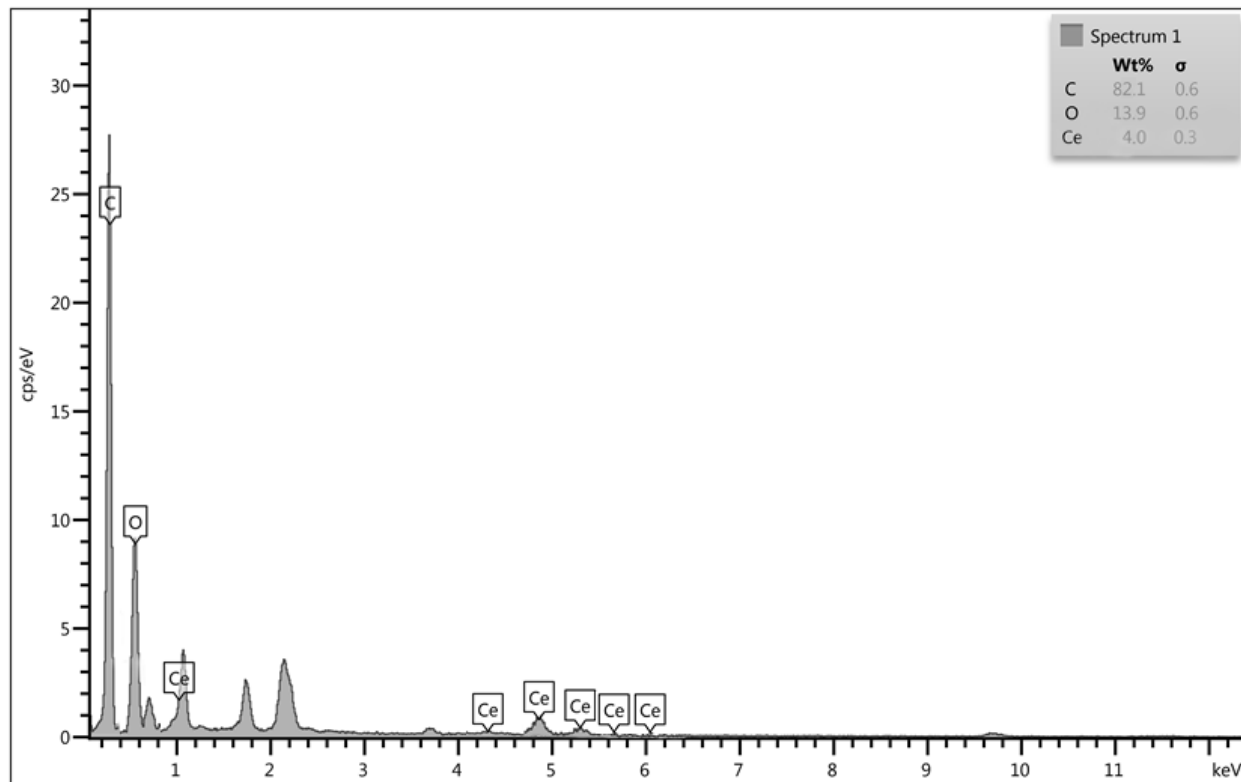

Fig. S6 EDX analysis of CG3.
